# Supplementary material
Source: HighWire-hosted journal article supplement (https://le.uwpress.org/highwire/filestream/2910/field_highwire_adjunct_files/4/LE-96-4-04-Liu-appE.pdf)
Supplement: LE-96-4-04-Liu-appE.pdf [file LE-96-4-04-Liu-appE.pdf]

**Appendix E: Spatial distribution of policy costs and tax burden**

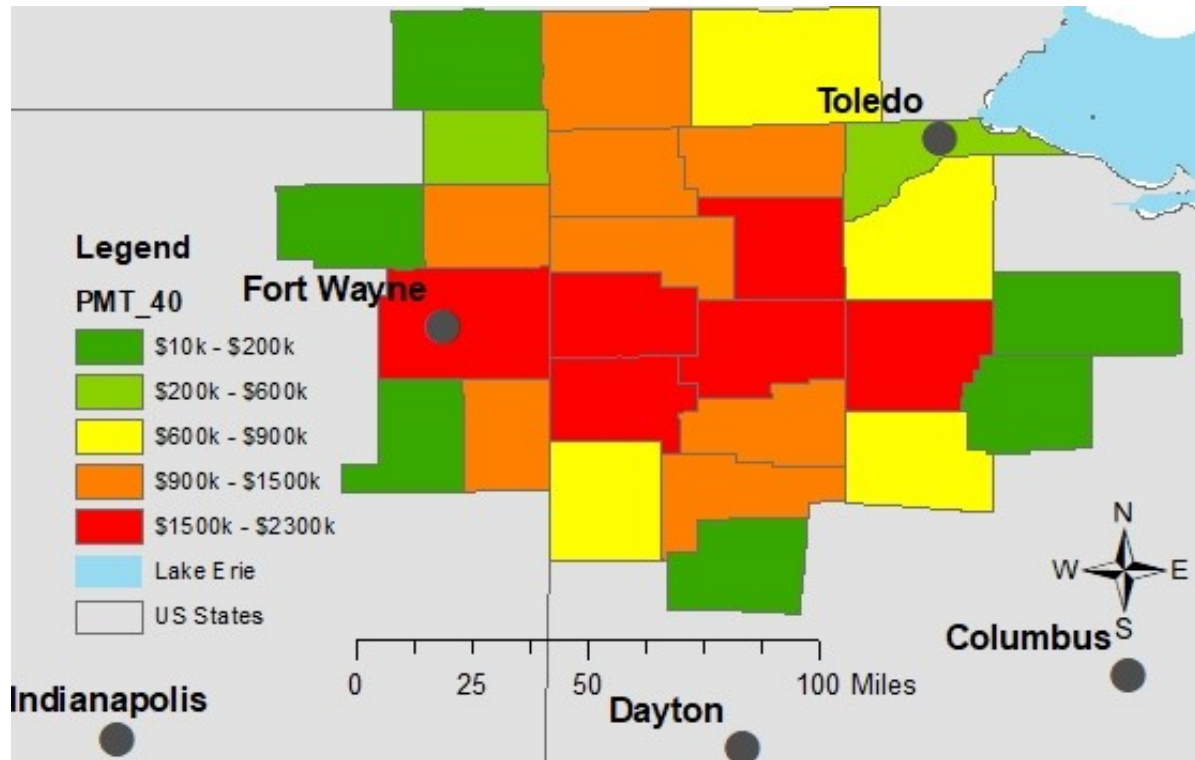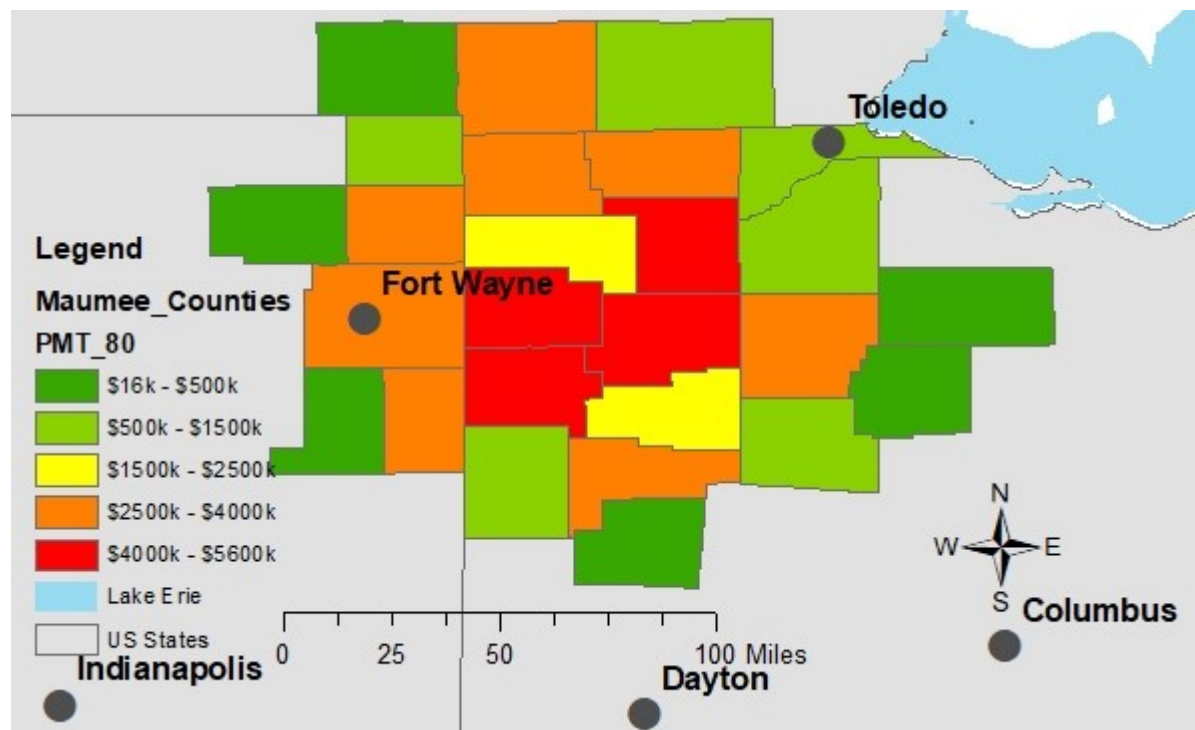

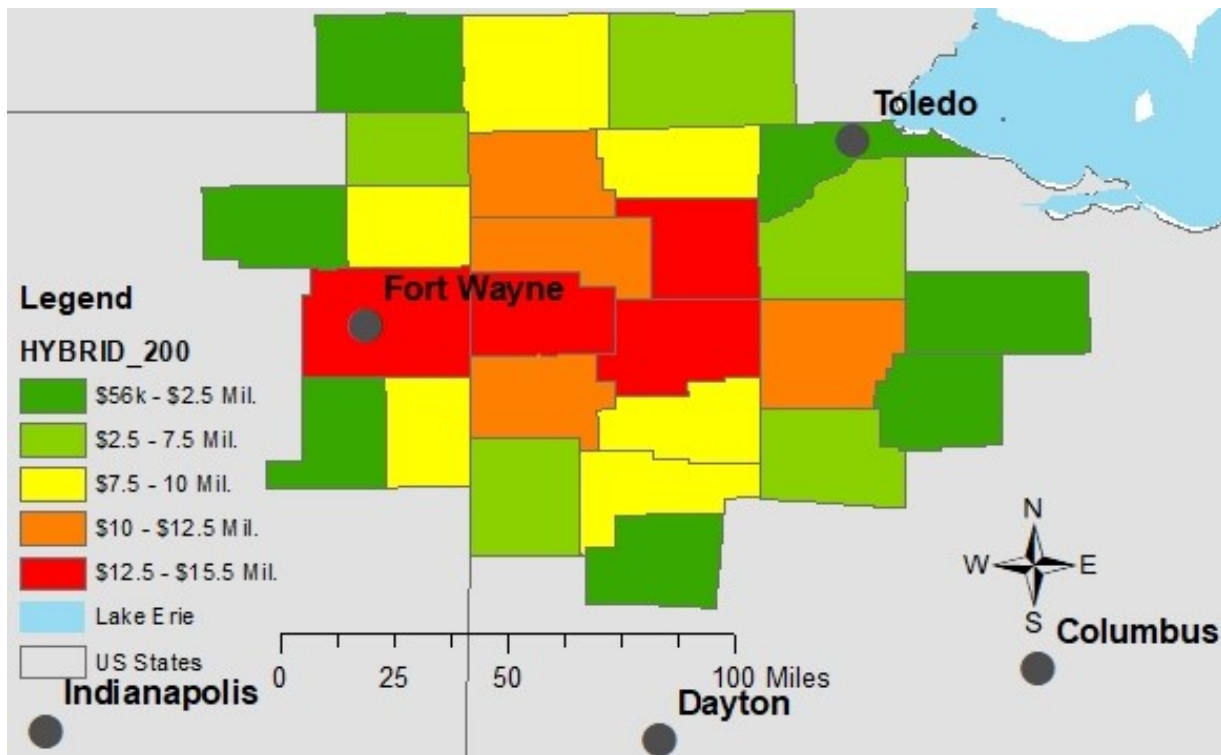

Figure E1. Policy costs and tax burden for: (a) \$40/acre uniform payment, (b) \$80/acre spatially targeted payment, (c) 200% tax+payment hybrid policy.
